# Supplementary material for: Syntheses, crystal structures and thermal properties of six coordination polymers based on 2-(p-methylphenyl)-imidazole dicarboxylate
Source: Royal Society of Chemistry journal article supplement (doi:10.1039/c3dt51747k), 2013-01-01
Supplement: c3dt51747k.pdf [file c3dt51747k.pdf]

# Syntheses, crystal structures and thermal properties of six coordination polymers based on 2-(p-methylphenyl)-imidazole dicarboxylate

Yu Zhang, Pengfei Yuan, Yanyan Zhu, Gang Li\*

## Supporting Information

**Table S1.** Selected Bond Distances (Å) and Angles (deg) for Compounds **1-6**

| <b>1</b>            |            |                     |            |
|---------------------|------------|---------------------|------------|
| Pb(1)-N(11)         | 2.470(4)   | Pb(1)-O(7)          | 2.565(4)   |
| Pb(1)-O(2)          | 2.614(3)   | Pb(1)-N(4)          | 2.627(4)   |
| Pb(1)-O(5)#2        | 2.636(3)   | Pb(1)-N(5)          | 2.672(4)   |
| N(11)-Pb(1)-O(7)    | 66.76(13)  | N(11)-Pb(1)-O(2)    | 95.36(12)  |
| O(7)-Pb(1)-O(2)     | 74.45(14)  | N(11)-Pb(1)-N(4)    | 79.40(13)  |
| O(7)-Pb(1)-N(4)     | 128.99(14) | O(2)-Pb(1)-N(4)     | 71.93(12)  |
| N(11)-Pb(1)-O(5)#2  | 72.44(13)  | O(7)-Pb(1)-O(5)#2   | 81.68(14)  |
| O(2)-Pb(1)-O(5)#2   | 155.99(12) | N(4)-Pb(1)-O(5)#2   | 123.74(12) |
| N(11)-Pb(1)-N(5)    | 100.81(13) | O(7)-Pb(1)-N(5)     | 157.46(15) |
| N(4)-Pb(1)-N(5)     | 62.18(13)  | O(5)#2-Pb(1)-N(5)   | 76.50(13)  |
| <b>2</b>            |            |                     |            |
| N(1)-Pb(1)          | 2.695(3)   | O(2)-Pb(1)          | 2.476(3)   |
| O(3)-Pb(1)#1        | 2.645(2)   | Pb(1)-O(2)#2        | 2.476(3)   |
| Pb(1)-O(3)#3        | 2.645(3)   | Pb(1)-O(3)#4        | 2.645(3)   |
| Pb(1)-N(1)#2        | 2.695(3)   | O(2)-Pb(1)-O(2)#2   | 101.14(15) |
| O(2)-Pb(1)-O(3)#3   | 152.87(8)  | O(2)#2-Pb(1)-O(3)#3 | 85.10(9)   |
| O(2)#2-Pb(1)-O(3)#4 | 152.87(8)  | O(3)#3-Pb(1)-O(3)#4 | 101.41(12) |
| O(2)-Pb(1)-N(1)#2   | 80.99(8)   | O(2)#2-Pb(1)-N(1)#2 | 64.85(8)   |
| O(3)#3-Pb(1)-N(1)#2 | 124.77(8)  | O(3)#4-Pb(1)-N(1)#2 | 90.55(9)   |
| O(3)#4-Pb(1)-N(1)   | 124.77(8)  | N(1)#2-Pb(1)-N(1)   | 125.51(12) |
| <b>3</b>            |            |                     |            |
| Cd(1)-N(1)          | 2.253(4)   | Cd(1)-N(1)#1        | 2.253(4)   |

|                     |            |                     |            |
|---------------------|------------|---------------------|------------|
| Cd(1)-O(7)          | 2.399(4)   | Cd(1)-O(7)#1        | 2.399(4)   |
| Cd(1)-O(5)          | 2.405(4)   | Cd(1)-O(5)#1        | 2.405(4)   |
| Cd(2)-N(2)          | 2.236(4)   | Cd(2)-O(6)#2        | 2.282(4)   |
| Cd(2)-O(2)#3        | 2.284(4)   | Cd(2)-O(9)          | 2.313(4)   |
| Cd(2)-N(3)#2        | 2.326(4)   | Cd(2)-O(2)          | 2.488(4)   |
| N(1)-Cd(1)-N(1)#1   | 180.00(14) | N(1)-Cd(1)-O(7)     | 72.78(14)  |
| N(1)#1-Cd(1)-O(7)   | 107.22(14) | N(1)-Cd(1)-O(5)     | 88.07(15)  |
| N(1)#1-Cd(1)-O(5)   | 91.93(15)  | O(7)-Cd(1)-O(5)     | 76.26(14)  |
| O(7)#1-Cd(1)-O(5)   | 103.74(14) | N(2)-Cd(2)-O(6)#2   | 109.43(15) |
| N(2)-Cd(2)-O(2)#3   | 142.35(15) | O(6)#2-Cd(2)-O(2)#3 | 81.94(14)  |
| N(2)-Cd(2)-O(9)     | 99.15(15)  | O(6)#2-Cd(2)-O(9)   | 151.41(14) |
| O(2)#3-Cd(2)-N(3)#2 | 112.38(15) | N(2)-Cd(2)-O(2)     | 70.24(14)  |
| O(9)-Cd(2)-O(2)     | 78.37(14)  | N(3)#2-Cd(2)-O(2)   | 174.72(14) |
| <b>4</b>            |            |                     |            |
| Cd(1)-N(2)#1        | 2.185(10)  | Cd(1)-O(4)#1        | 2.517(11)  |
| Cd(1)-N(1)          | 2.240(11)  | Cd(1)-O(5)          | 2.28(2)    |
| Cd(1)-O(1)#2        | 2.285(9)   | Cd(1)-O(1)          | 2.395(9)   |
| N(2)#1-Cd(1)-N(1)   | 113.9(4)   | N(2)#1-Cd(1)-O(5)   | 118.5(7)   |
| N(1)-Cd(1)-O(5)     | 93.7(6)    | N(2)#1-Cd(1)-O(1)#2 | 96.6(3)    |
| N(1)-Cd(1)-O(1)#2   | 142.3(4)   | O(5)-Cd(1)-O(1)#2   | 90.3(7)    |
| N(2)#1-Cd(1)-O(1)   | 144.8(4)   | N(1)-Cd(1)-O(1)     | 70.9(4)    |
| O(1)-Cd(1)-O(4)#1   | 74.7(4)    | O(5)-Cd(1)-O(4)#1   | 168.9(8)   |
| N(1)-Cd(1)-O(4)#1   | 87.0(4)    | O(1)#2-Cd(1)-O(4)#1 | 82.5(4)    |
| <b>5</b>            |            |                     |            |
| Cd(1)-N(2)          | 2.2349(18) | Cd(1)-N(3)#1        | 2.2777(19) |
| Cd(1)-O(1)          | 2.2949(16) | Cd(1)-N(1)          | 2.338(2)   |
| Cd(1)-O(1)#2        | 2.4347(18) | Cd(1)-O(4)          | 2.4776(19) |
| N(2)-Cd(1)-N(3)#1   | 113.21(7)  | N(2)-Cd(1)-O(1)     | 100.15(6)  |
| N(3)#1-Cd(1)-O(1)   | 139.31(6)  | N(2)-Cd(1)-N(1)     | 116.31(8)  |
| N(2)-Cd(1)-O(1)#2   | 146.14(6)  | N(3)#1-Cd(1)-O(1)#2 | 71.42(6)   |
| O(1)-Cd(1)-O(1)#2   | 67.91(7)   | N(1)-Cd(1)-O(1)#2   | 96.65(7)   |
| N(3)#1-Cd(1)-O(4)   | 81.17(7)   | O(1)-Cd(1)-O(4)     | 88.20(7)   |
| N(1)-Cd(1)-O(4)     | 170.61(7)  | O(1)#2-Cd(1)-O(4)   | 76.15(6)   |
| <b>6</b>            |            |                     |            |
| Mn(1)-O(7)#4        | 2.120(2)   | Mn(1)-N(6)#5        | 2.223(3)   |
| Mn(1)-N(6)#6        | 2.223(3)   | Mn(1)-O(9)#4        | 2.235(3)   |

|                     |            |                     |            |
|---------------------|------------|---------------------|------------|
| Mn(1)-O(9)          | 2.235(3)   | Mn(2)-O(8)#5        | 2.125(2)   |
| Mn(2)-O(3)          | 2.131(2)   | Mn(2)-O(1)          | 2.164(3)   |
| Mn(2)-O(4)          | 2.203(2)   | Mn(2)-N(1)          | 2.261(3)   |
| Mn(2)-N(2)          | 2.277(3)   | O(7)#4-Mn(1)-O(7)   | 180.00(17) |
| O(7)#4-Mn(1)-N(6)#5 | 91.42(10)  | O(7)-Mn(1)-N(6)#5   | 88.58(10)  |
| O(7)#4-Mn(1)-O(9)#4 | 91.96(10)  | O(7)-Mn(1)-O(9)#4   | 88.04(10)  |
| N(6)#5-Mn(1)-O(9)#4 | 75.45(10)  | N(6)#6-Mn(1)-O(9)#4 | 104.55(10) |
| N(6)#5-Mn(1)-O(9)   | 104.55(10) | N(6)#6-Mn(1)-O(9)   | 75.45(10)  |
| O(8)#5-Mn(2)-O(3)   | 87.54(10)  | O(8)#5-Mn(2)-O(1)   | 91.28(10)  |
| O(3)-Mn(2)-O(1)     | 178.28(10) | O(8)#5-Mn(2)-O(4)   | 84.29(9)   |
| O(8)#5-Mn(2)-N(1)   | 95.24(11)  | O(4)-Mn(2)-N(1)     | 179.53(11) |
| O(8)#5-Mn(2)-N(2)   | 157.32(10) | O(3)-Mn(2)-N(2)     | 92.84(11)  |
| O(4)-Mn(2)-N(2)     | 73.03(10)  | N(1)-Mn(2)-N(2)     | 107.45(11) |

Symmetry transformations used to generate equivalent atoms for **1**: #1:  $-x+2, y, -z+1/2$ . #2:  $x, -y+1, z+1/2$ . #3:  $x, -y+1, z-1/2$ . For **2**: #1:  $-y+1/4, x+3/4, z-1/4$ . #2:  $-x+0, -y+1/2, z+0$ . #3:  $-y+3/4, x+1/4, z+1/4$ . #4:  $y-3/4, -x+1/4, z+1/4$ . For **3**: #1:  $-x+2, -y, -z+2$ . #2:  $-x+2, -y+1, -z+2$ . #3:  $-x+3, -y+1, -z+2$ . For **4**: #1:  $y-1/4, -x+7/4, z-1/4$ . #2:  $-x+3/2, -y+3/2, -z+3/2$ . #3:  $-y+7/4, x+1/4, z+1/4$ . For **5**: #1:  $y+1/4, -x+5/4, z+1/4$ . #2:  $-x+2, -y+1, -z+2$ . For **6**: #1:  $-x, -y+2, -z+1$ . #2:  $-x+1/2, y-1/2, -z+1/2$ . #3:  $x+1/2, -y+1/2, z+1/2$ . #4:  $-x, -y+1, -z$ . #5:  $-x+1/2, y+1/2, -z+1/2$ .

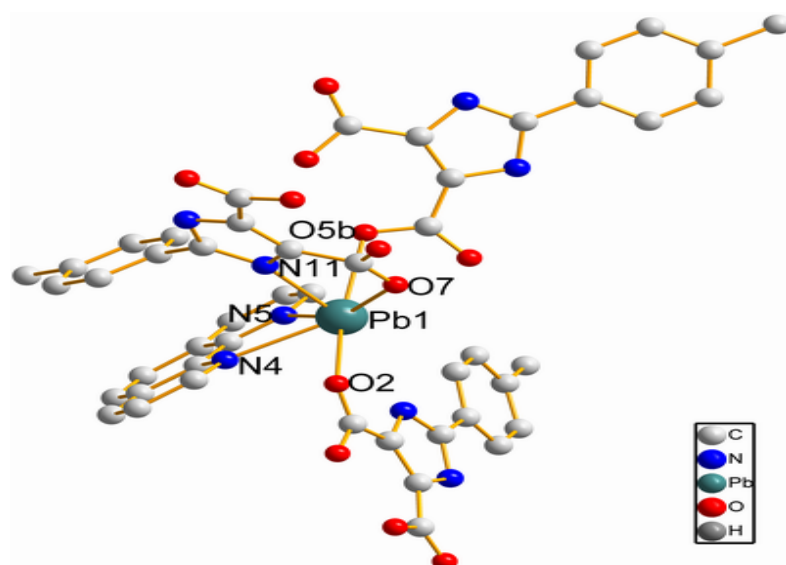

**Figure S1.** Local coordination environment of Pb(II) ion in **1** (symmetry code: b:  $x, -y+1, z+1/2$ . hydrogen atoms omitted for clarity).

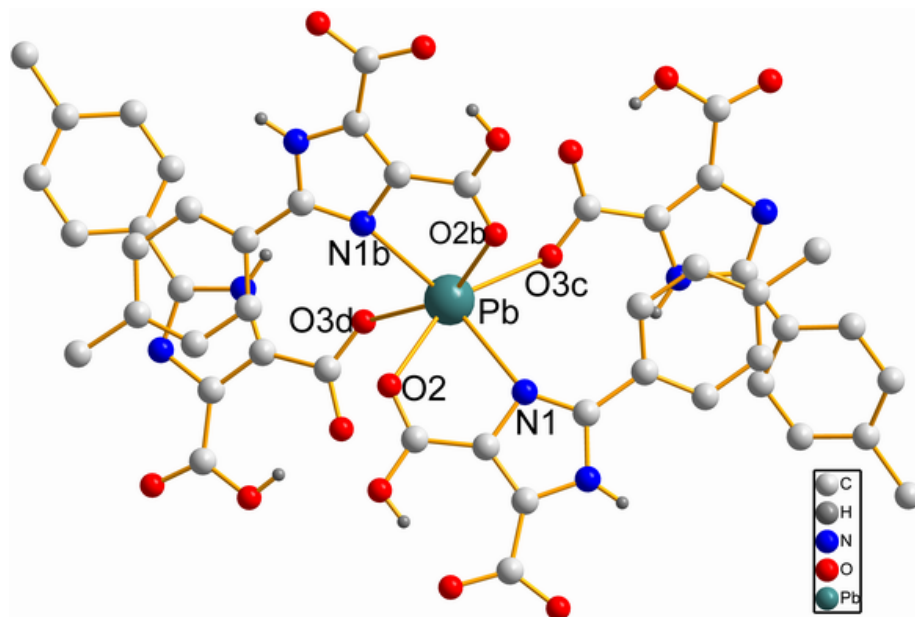

**Figure S2.** Coordination arrangement of the Pb(II) atom in complex **2** (symmetry code: a:  $-y+1/4, x+3/4, z-1/4$ . b:  $-x+0, -y+1/2, z+0$ . c:  $-y+3/4, x+1/4, z+1/4$ . Partial hydrogen atoms omitted for clarity).

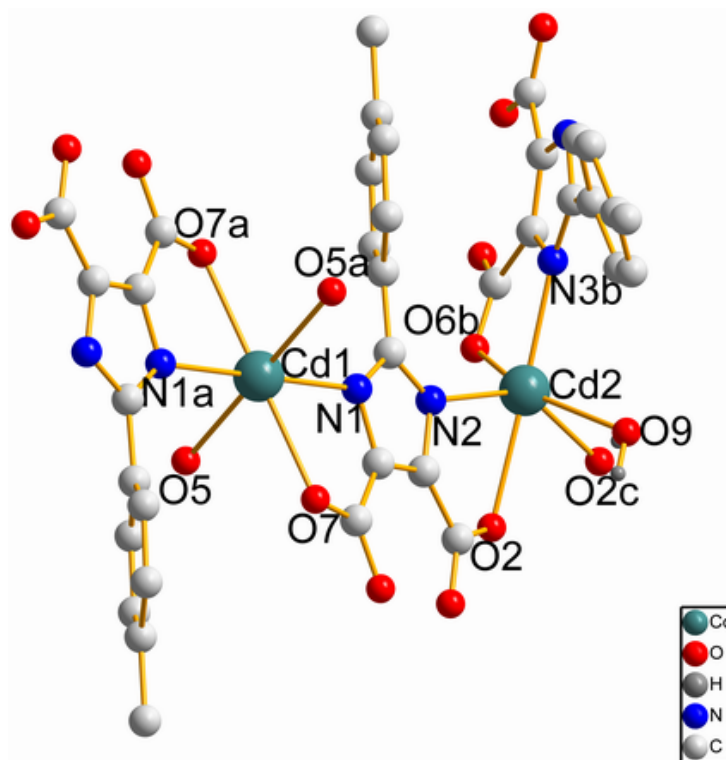

**Figure S3.** Coordination environments of the Cd(II) atoms with atomic labels in **3** (symmetry code: a:  $-x+2, -y, -z+2$ . b:  $-x+2, -y+1, -z+2$ . c:  $-x+3, -y+1, -z+2$ . hydrogen atoms omitted for clarity).

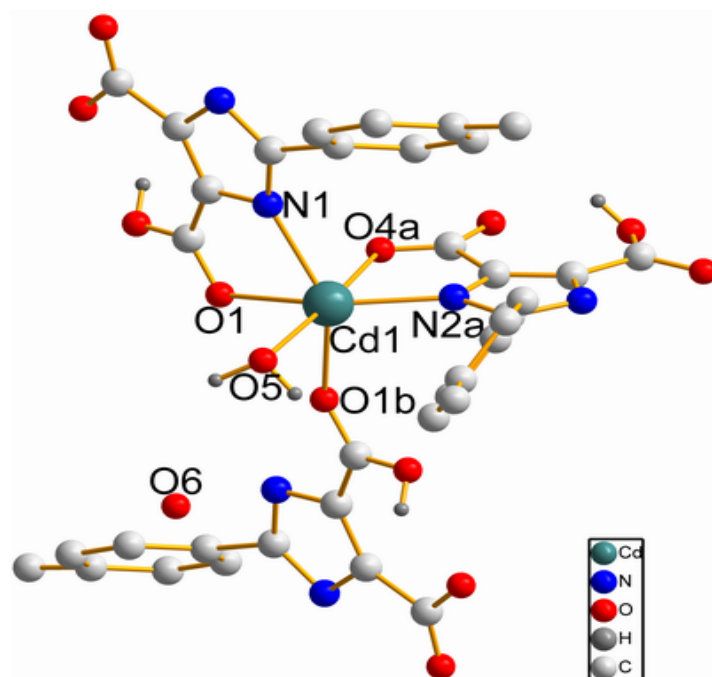

**Figure S4.** Coordination environment of the Cd(II) atom with atomic labels in **4** (symmetry code: a:  $y-1/4, -x+7/4, z-1/4$ . b:  $-x+3/2, -y+3/2, -z+3/2$ . hydrogen atoms omitted for clarity).

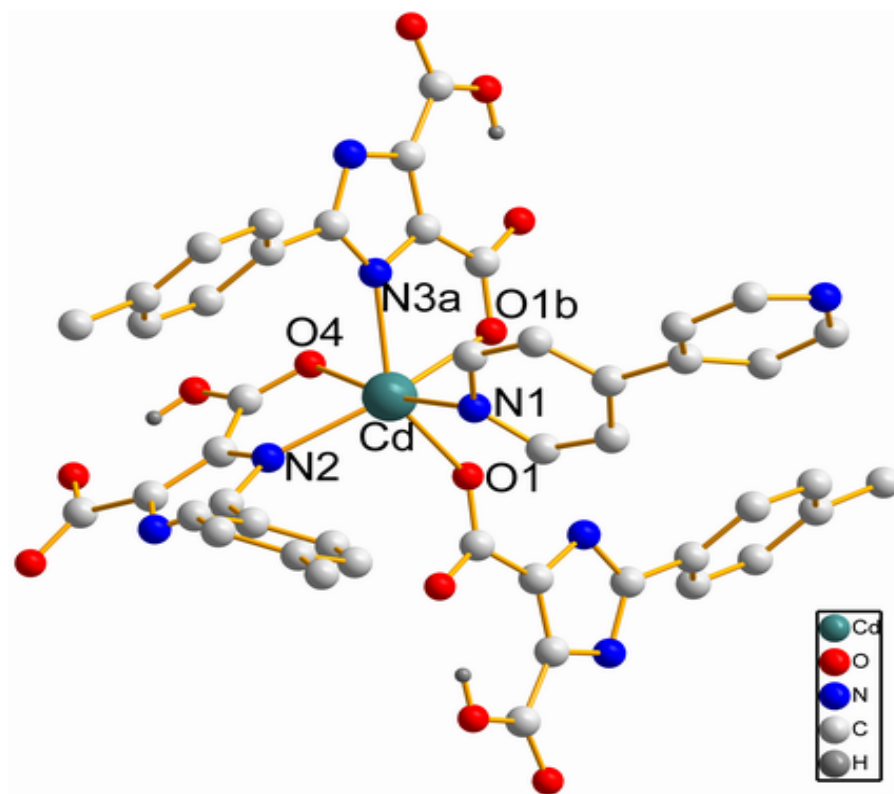

**Figure S5.** Coordination environment of the Cd(II) atom in **5** (symmetry code: a:  $y+1/4, -x+5/4, z+1/4$ . b:  $-x+2, -y+1, -z+2$ . Partial MePhHIDC<sup>2-</sup> anions omitted for clarity and hydrogen atoms omitted for clarity).

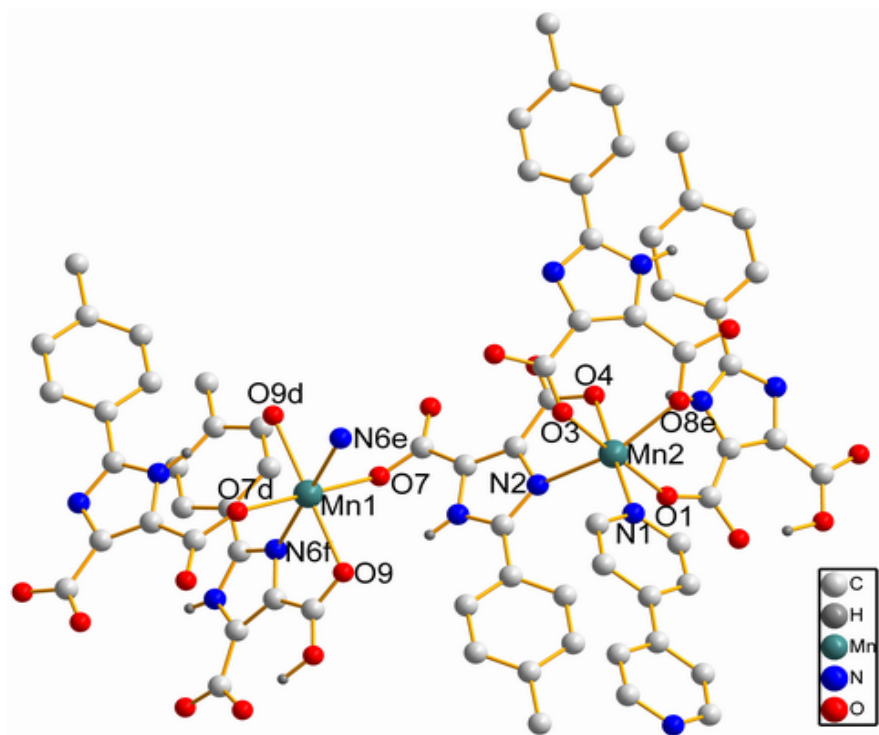

**Figure S6.** Coordination environments of Mn(II) atoms in polymer **6** (symmetry code: a:  $-x, -y+2, -z+1$ . b:  $-x+1/2, y-1/2, -z+1/2$ . c:  $x+1/2, -y+1/2, z+1/2$ . d:  $-x, -y+1, -z$ . e:  $-x+1/2, y+1/2, -z+1/2$ . Partial H atoms omitted for clarity).
